# Supplementary material
Source: PubMed Central journal article supplement (PMC4084624)
Supplement: NIHMS578762-supplement-01.pdf [file NIHMS578762-supplement-01.pdf]

## SUPPLEMENTAL INFORMATION

### RT-PCR primers:

|               |                                     |                                       |
|---------------|-------------------------------------|---------------------------------------|
| IL-1 $\beta$  | Fw: 5'-CAACCAACAAGTGATATTCTCCATG-3' | Rev: 5'-GATCCACACTCTCCAGCTGCA-3'      |
| IL-6          | Fw: 5'-CCACTTCACAAGTCGGAGGC-3'      | Rev: 5'-TGCAAGTGCATCATCGTTGTTC-3'     |
| IL-17A        | Fw: 5'-GGACTCTCCACCGCAATGA-3'       | Rev: 5'-GGCACTGAGCTTCCCAGATC-3'       |
| IL-21         | Fw: 5'-AAGATTCCTGAGGATCCGAGAAG-3'   | Rev: 5'-TGCATTCGTGAGCGTCTATAGTG-3'    |
| IL-23 p19     | Fw: 5'-CTGGAACGCACATGCACCAG-3'      | Rev: 5'-TGTTGTCCTTGAGTCCTTGTGG-3'     |
| TGF- $\beta$  | Fw: 5'-CACTGATACGCCTGAGTGGC-3'      | Rev: 5'-TGCTGTCACAAGAGCAGTGAG-3'      |
| SAA1          | Fw: 5'-CATTTGTTACGAGGCTTTCC-3'      | Rev: 5'-GTTTTTCCAGTTAGCTTCCTTCATGT-3' |
| SAA3          | Fw: 5'-CGCAGCACGAGCAGGAT-3'         | Rev: 5'-CCAGGATCAAGATGCAAAGAATG-3'    |
| NOS2          | Fw: 5'-ATGCTGCCACCTTGGAGTTCAC-3'    | Rev: 5'-GGCCACCCACCTCCAGTAGC-3'       |
| Reg3 $\gamma$ | Fw: 5'-CCTGATGCTCCTTTCTCAGG-3'      | Rev: 5'-ATGTCCTGAGGGCCTCTTTT-3'       |

## SUPPLEMENTAL FIGURE LEGENDS

### Figure S1. SFB-induced intestinal Th17 cells require MHCII expression in the periphery (related to Figure 1)

**A.** Cytokine expression in SI LP TCR $\beta^+$ CD4 $^+$  cells in 10-week old SFB-monocolonized mice (SFB-mono) and germ-free (GF) controls or in SFB-negative conventionally-raised mice (SPF) before and 2 weeks after colonization with SFB

**B.** Foxp3 expression in CD4T cells isolated from the corresponding tissues of SFB-positive WT and *H2-AbI* $^{-/-}$  mice. Plots gated on TCR $\beta^+$ CD4 $^+$  cells

**C-D.** 5x10 $^6$  sorted naïve CD4 T cells were transferred into WT and *H2-AbI* $^{-/-}$  mice before or after colonization with SFB. IL-17 expression was examined in transferred cells in the SI LP 2 weeks after transfer. Plots gated on donor TCR $\beta^+$ CD4 $^+$  cells

### Figure S2. SFB do not induce Th17 cell differentiation of non-SFB Tg T cells (related to Figure 2)

**A.** IL-17 expression in SI LP CD4 T cells from SFB-positive OTII.B6 TCR Tg mice before or after

stimulation with cognate antigen. OVA stimulation was performed by supplying 1% OVA protein in the drinking water *ad libitum* for 10-14 days. Left,  $V\alpha 2^{\text{hi}}V\beta 5^{\text{hi}}$  plots are gated through the gate shown in (B). Right, IL-17 expression in CD4 T cells outside the  $V\alpha 2^{\text{hi}}V\beta 5^{\text{hi}}$  gate

**B.** Expression of the Tg  $V\alpha 2$  and  $V\beta 5$  in CD4 T cells isolated from the corresponding tissues of SFB-positive OTII.B6 TCR Tg mice in the absence of OVA stimulation. Plots are gated on  $\text{TCR}\beta^+\text{CD4}^+$  cells.  $V\alpha 2^{\text{hi}}V\beta 5^{\text{hi}}$  CD4 T cells include cells expressing the Tg TCR

**C.** SI LP Th17 cells express alternative TCRs.  $V\alpha 2$  and  $V\beta 5$  expression in  $\text{IL-17}^+$  vs  $\text{IL-17}^-$  CD4 T cells in the SI LP of SFB-positive OVA.B6 Tg mice. All plots initially gated on  $\text{TCR}\beta^+\text{CD4}^+$  cells

**D.** SI LP Th17 cells and lymph node CD4 T cells from OTII.B6  $Il17^{\text{GFP}}$  mice were labeled with CellTrace Violet (SI) or CFSE (LN) and stimulated *in vitro* with  $\text{TCR}\alpha$ -deficient splenocytes and OVA peptide or SFB lysates for 3 days. Plots gated on  $\text{TCR}\beta^+\text{CD4}^+$  cells. Top,  $\text{GFP}^+$  ( $\text{IL-17}^+$ ) CD4 T cells purified by FACS from SI LP. Middle, CD4 T cells were purified from MLNs by MACS using anti-CD4 magnetic beads. Bottom, Splenic CD4 T cells from TRP-1.RAG Tg mice were purified by MACS using anti-CD4 magnetic beads, labeled with CFSE, and stimulated *in vitro* with TRP-1 peptide or SFB antigens for 3 days in the presence  $\text{TCR}\alpha$ -deficient splenocytes

**E-F.** SFB-free OTII.RAG or TRP-1.RAG TCR Tg mice were colonized with SFB-containing microbiota from Taconic B6 mice. Colonization levels were confirmed by Q-PCR. 2-4 weeks later SFB-negative and SFB-positive mice were stimulated *in vivo* with the corresponding antigen

**E.** OTII.RAG mice were stimulated with OVA by oral gavage at Day 1, 3 and 5 and by providing 1% OVA in the drinking water *ad libitum*. SI LP cells were isolated on Day 12-14. RAG-sufficient SFB-positive control mouse is shown for comparison

**F.** TRP-1.RAG mice were immunized i.p. with 50  $\mu\text{g}$  TRP-1 peptide and 10  $\mu\text{g}$  LPS on Day 1 and 7. Control mice received 10  $\mu\text{g}$  LPS only. SI LP cells were isolated on Day 12-14

**Figure S3. SFB do not induce Th17 cell differentiation of non-SFB Tg T cells (related to Figure 2)**

**A.**  $5 \times 10^6$  CD45.2<sup>+</sup> CD4 T cells were purified from spleens and peripheral LNs of TRP-1.RAG mice by MACS using anti-CD4 magnetic beads and transferred into CD45.1<sup>+</sup> recipients before or 12-14 days after colonization with SFB (Day 0). Recipient animals were immunized i.p. with 50  $\mu$ g TRP-1 peptide and 10  $\mu$ g LPS on Day 1 and 7. Control mice received transferred CD4 T cells and 10  $\mu$ g LPS only. Th17 cell induction was examined in transferred Tg (CD45.2<sup>+</sup>) and endogenous WT (CD45.1<sup>+</sup>) cells 12-14 days after transfer

**B.**  $5 \times 10^6$  CD45.2<sup>+</sup>CD90.1<sup>+</sup> WT CD4 T cells and  $5 \times 10^6$  CD45.2<sup>+</sup>CD90.2<sup>+</sup> TRP-1 Tg CD4 T cells were purified from spleens and peripheral LNs of WT and TRP-1.RAG mice respectively, combined and co-transferred into WT CD45.1<sup>+</sup>CD90.2<sup>+</sup> recipients before or 12-14 days after colonization with SFB (Day 0). Recipient animals were immunized i.p. with 50  $\mu$ g TRP-1 peptide and 10  $\mu$ g LPS on Day 1 and 7. Th17 cell induction was examined in three different types of cells in the same animal 12 days after transfer. H - endogenous host WT cells (CD45.1<sup>+</sup>CD90.2<sup>+</sup>); W – transferred WT cells (CD45.2<sup>+</sup>CD90.1<sup>+</sup>); T - transferred Tg cells (CD45.2<sup>+</sup>CD90.2<sup>+</sup>)

**C.** GFP and IL-17 expression in total SI LP cells (left and middle panel) and in CD4 T cells (right panel) isolated from the SI LP of heterozygous *Il17*<sup>GFP</sup> reporter mice

**D.** Sorting scheme for isolation of purified SFB filaments. Feces from SFB-monocolonized mice were processed as described in Methods and stained with the SYTO9 component of the Live/Dead<sup>R</sup>BacLight<sup>TM</sup> Bacterial Viability Kit (Life Technologies). SFB filaments were identified by SYTO9 staining and large size (SSC-W) and sorted on FACS Aria II (BD) to high purity. Representative FACS plots and photos show the presence of mostly large SFB filaments and absence of small bacterial cells or host/fecal debris after sorting. PBS only, negative control of sterile PBS used to resuspend the SFB sample after sorting. Arrowheads, SFB filaments of variable size in the sample used for sorting

**E.** GFP<sup>+</sup> (Th17) and GFP<sup>-</sup> (non-Th17) TCR $\beta$ <sup>+</sup>CD4<sup>+</sup> cells were purified by FACS from SI LP of SFB-positive *Il17*<sup>GFP</sup> reporter mice and stimulated *in vitro* with SFB lysates prepared after density gradient

(SFB Gradient) or from SFB filaments purified by cell sorting on panel C (SFB Sorted)

**F.** GFP<sup>+</sup> (Th17) and GFP<sup>-</sup> (non-Th17) TCRβ<sup>+</sup>CD4<sup>+</sup> cells were purified by FACS from SI LP of SFB-positive (SFB+) or SFB-negative (No SFB) *Rorc*<sup>GFP</sup> reporter mice and stimulated *in vitro* with SFB antigens

**G.** IL-17 expression in proliferated (CellTrace<sup>lo</sup>) GFP<sup>+</sup> and GFP<sup>-</sup> SI LP CD4 T cells from Figure 2F stimulated *in vitro* with SFB antigens for 3 days. Plots are gated on live, proliferated T cells

**Figure S4. SFB induce Th17 cells with diverse Vβ utilization (related to Figure 3)**

**A.** SFB-negative Jackson B6 mice (Jax) were colonized with SFB by oral gavage with SFB-containing Taconic feces (Jax + SFB) and IL-17 induction in different Vβ families was examined by flow cytometry 14 days after colonization. Plots represent percentage of IL-17<sup>+</sup> cells in the TCRβ<sup>+</sup>CD4<sup>+</sup>Vβ<sup>+</sup> subset for the corresponding Vβ.

**B.** Vβ and IL-17 expression in SI LP CD4 T cells of germ-free and SFB-monocolonized C57BL/6 mice. Plots represent percentage of IL-17<sup>+</sup> cells in the TCRβ<sup>+</sup>CD4<sup>+</sup>Vβ<sup>+</sup> subset for the corresponding Vβ. ND, not determined

**Figure S5. Effects of SFB colonization in DC<sup>ΔMHCII</sup> mice (related to Figure 4)**

**A.** CD11c<sup>+</sup> cell subsets in the SI LP of DC<sup>ΔMHCII</sup> and control littermates. Bar plots represent total numbers or percentage of the corresponding subset in the CD11c<sup>+</sup> gate

**B.** MHCII expression in APC subsets from SI LP of WT and DC<sup>ΔMHCII</sup> mice

**C.** Relative expression of SFB-induced genes in terminal ileum of DC<sup>ΔMHCII</sup> and control littermates (WT) before and after colonization with SFB determined by RT-PCR. ns, not significant

**D.** Th1 cells in the SI LP of DC<sup>ΔMHCII</sup> and control littermates before and after SFB colonization

**E.** Foxp3 expression in CD4 T cells from the indicated organs. SFB-negative DC<sup>ΔMHCII</sup> mice and control littermates were colonized with SFB by oral gavage and Foxp3<sup>+</sup> Tregs analyzed 12-14 days later. Plots

represent the percentage of Foxp3<sup>+</sup> cells in the TCRβ<sup>+</sup>CD4<sup>+</sup> population. p values compare DC<sup>ΔMHCII</sup> mice to corresponding WT littermate group

**F.** SFB levels in fecal pellets from DC<sup>ΔMHCII</sup> and control littermates 3 weeks after SFB colonization

**G.** SFB attachment and MHCII expression in terminal ileum epithelial cells in WT and DC<sup>ΔMHCII</sup> mice colonized with SFB. Note lack of MHCII expression in LP of the DC<sup>ΔMHCII</sup> littermate. Blue, DNA; Green, MHCII; Red, Actin

**H.** SFB-negative Cμ-deficient and WT control mice were obtained from Jackson Laboratory. The mice were co-housed for a week and colonized with SFB by gavage with fecal homogenates from SFB-monocolonized mice. Control animals were gavaged with fecal homogenates from SFB-negative mice. SFB absence or colonization was confirmed by RT-PCR. Th17 cell induction was examined 12 days after gavage

**Figure S6. SFB-mediated Th17 cell responses in IEC<sup>ΔMHCII</sup> and ILC3<sup>ΔMHCII</sup> mice (related to Figure 5)**

**A.** MHCII expression on cell subsets from SI LP of WT and IEC<sup>ΔMHCII</sup> mice

**B.** SFB levels in feces of IEC<sup>ΔMHCII</sup> and control littermates assessed by 16S rRNA gene RT-PCR

**C.** MHCII expression in terminal ileum of IEC<sup>ΔMHCII</sup> mice and WT littermates 2 weeks after colonization with SFB. MHCII expression is observed only in the LP in IEC<sup>ΔMHCII</sup> mice. Arrows point to SFB filaments, attaching to IECs

**D.** MHCII expression on RORγt<sup>+</sup>c-kit<sup>+</sup>NKp46<sup>+</sup> (R2) and RORγt<sup>+</sup>c-kit<sup>+</sup>NKp46<sup>-</sup> (R3) ILCs in WT and ILC3<sup>ΔMHCII</sup> mice. R2 and R3 gates as shown on Figure 5D

**E.** MHCII expression on cell subsets from SI LP of WT and ILC3<sup>ΔMHCII</sup> mice

**F.** Normal colonic histology and lack of intestinal inflammation in ILC3<sup>ΔMHCII</sup> mice

**G.** Foxp3<sup>+</sup> Tregs in SI LP of ILC3<sup>ΔMHCII</sup> mice and control littermates before and after colonization with SFB

**H.** WT SFB-negative mice were gavaged twice with fecal homogenates from SFB-negative ILC3<sup>ΔMHCI</sup> mice (with high levels of SI LP Th17 cells). IFN $\gamma$  and IL-17 expression in SI LP CD4 T cells was examined 3 weeks after gavage

**I.** CD4 T cells were purified by cell sorting from SI LP of SFB-positive and SFB-negative WT and ILC3<sup>ΔMHCI</sup> mice and incubated *in vitro* with SFB or other bacterial lysates as in Figure 2. T cell proliferation was examined on Day 3 of culture

**J-K.** SFB colonization in feces and attachment to terminal ileum villi in ILC3<sup>ΔMHCI</sup> mice and control littermates

**L.** Total numbers of V $\beta$ 14<sup>+</sup>IL-17<sup>+</sup> Th17 cells in ILC3<sup>ΔMHCI</sup> mice and control littermates before and after colonization with SFB

**Figure S7. SFB priming of CD4 T cells in gut mucosa (related to Figure 6)**

10<sup>7</sup> MACS-purified CD4 T cells from spleens and LNs of CD45.2<sup>+</sup> *Il17*<sup>GFP</sup> mice were labeled with CellTrace Violet proliferation dye and adoptively transferred into WT CD45.1<sup>+</sup> mice before or 12 days after SFB colonization. T cell proliferation (dye dilution) and Th17 cell induction (GFP expression) was examined at different time points in small intestinal lamina propria (SI LP) and Peyer's Patches (PP). Very low proliferation and no Th17 cell induction was detected in SFB-negative animals (not shown)

**Table S1. Diverse TCR repertoire of SFB-recognizing hybridomas (related to Figure 3)**

CDR3 regions and V $\beta$  utilization in TCR $\beta$  chains, sequenced from 15 SFB-recognizing hybridomas. Clone numbers correspond to clone numbers on Figure 3B. The sequences are arranged by V $\beta$  usage (right-most column). The two identical sequences are highlighted in red

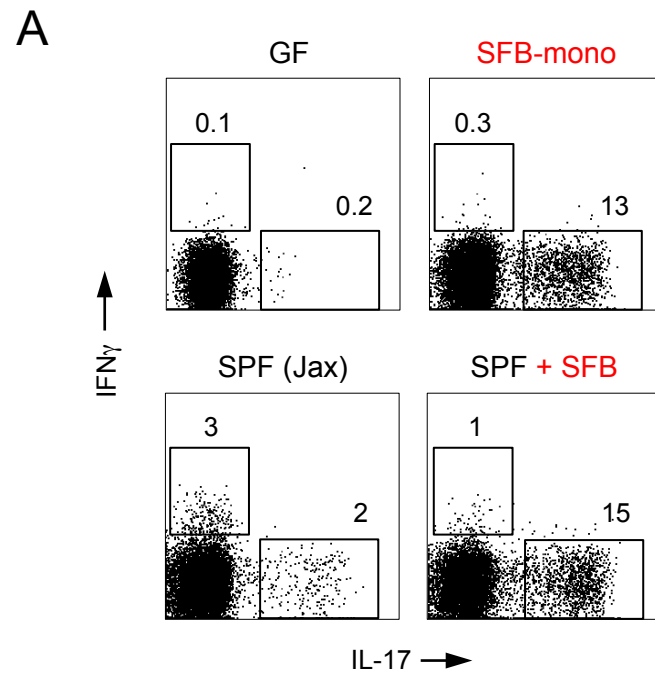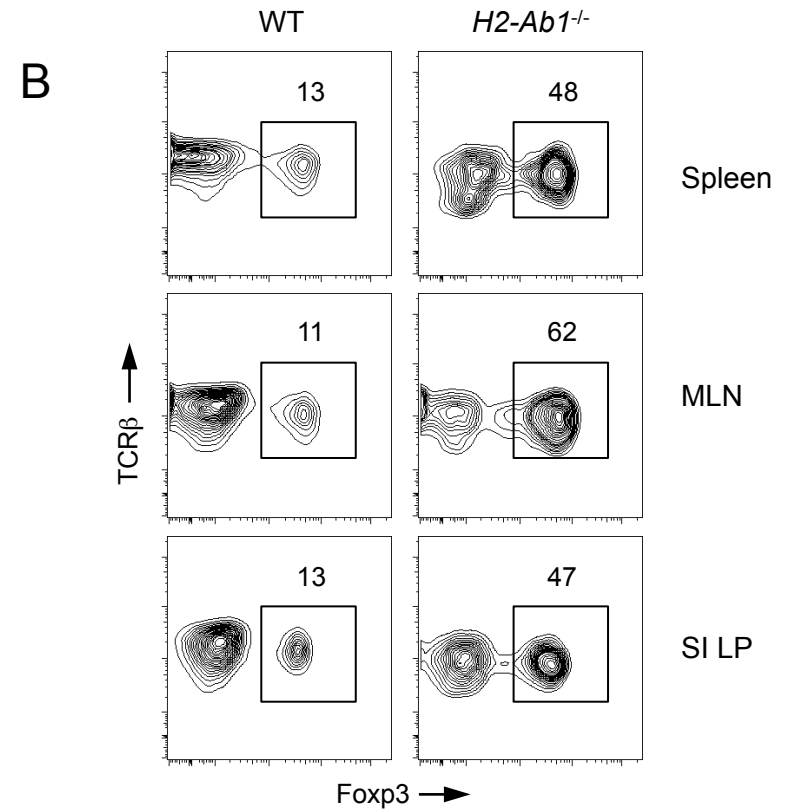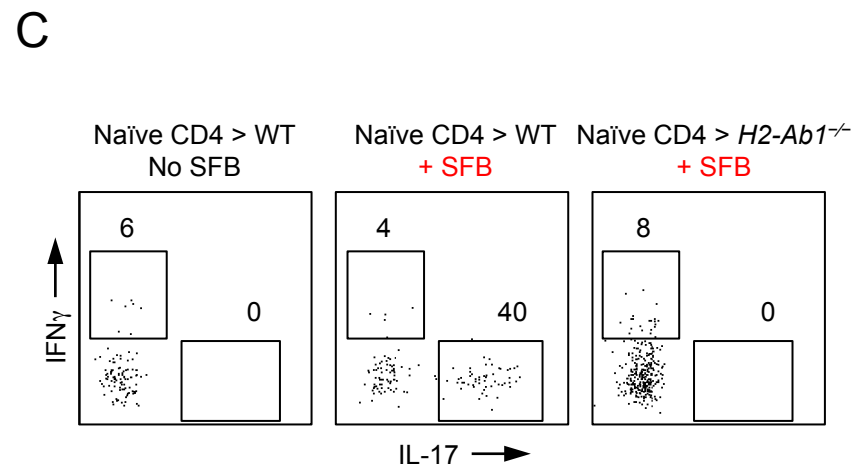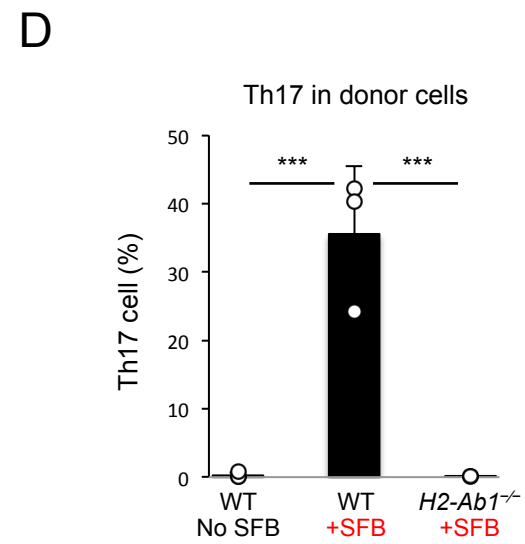

Figure S1

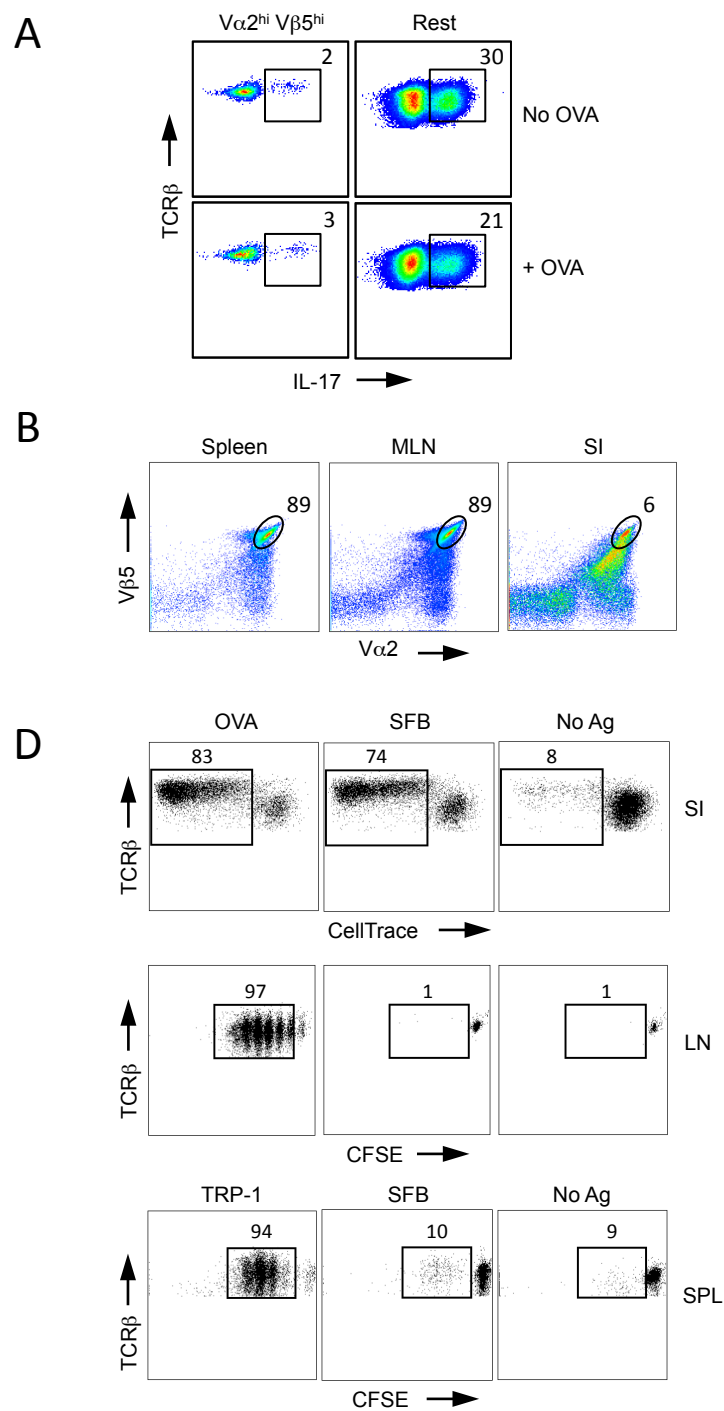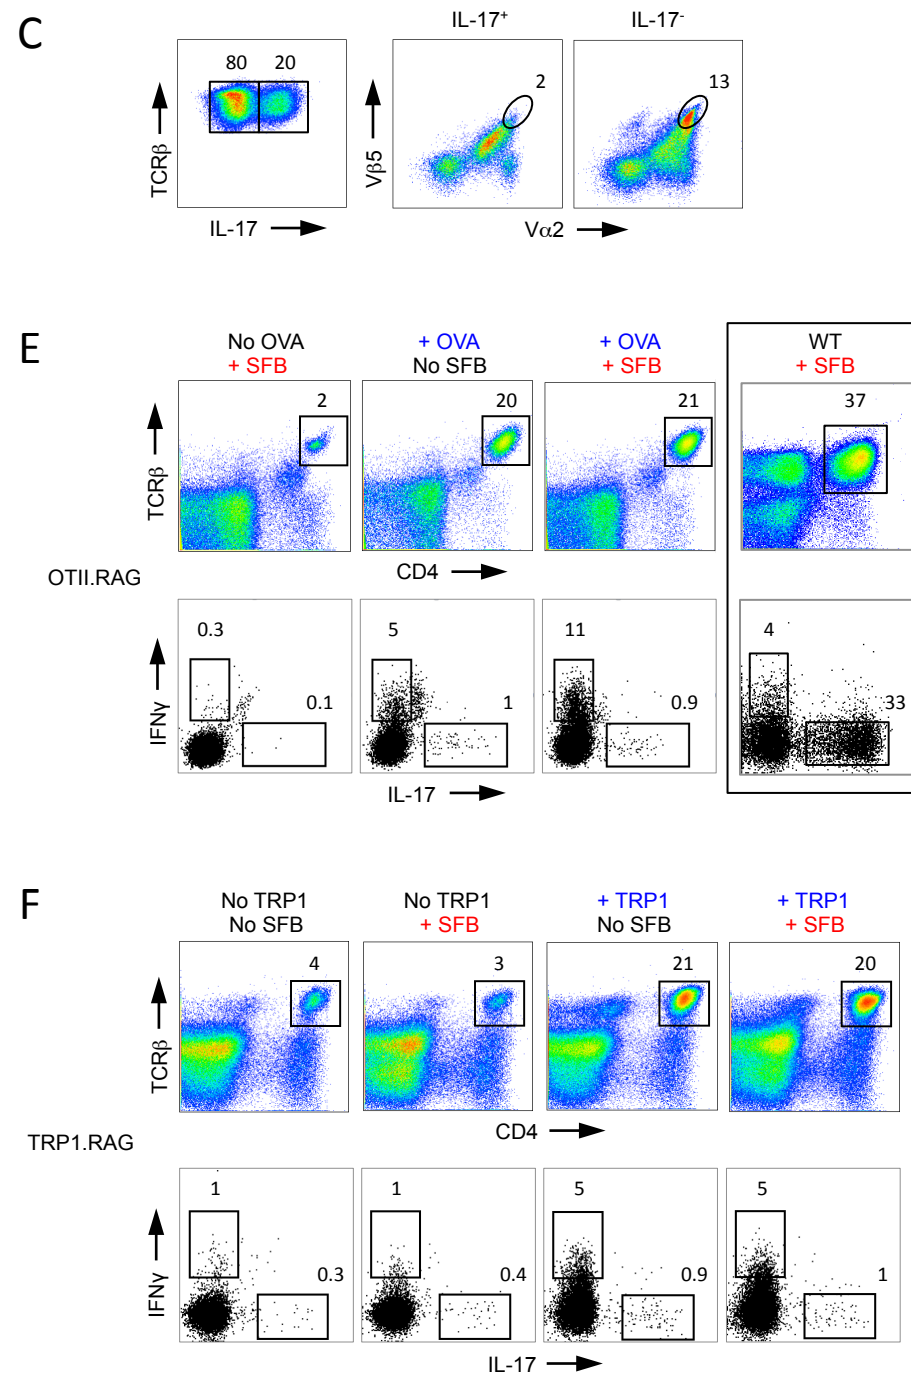

Figure S2

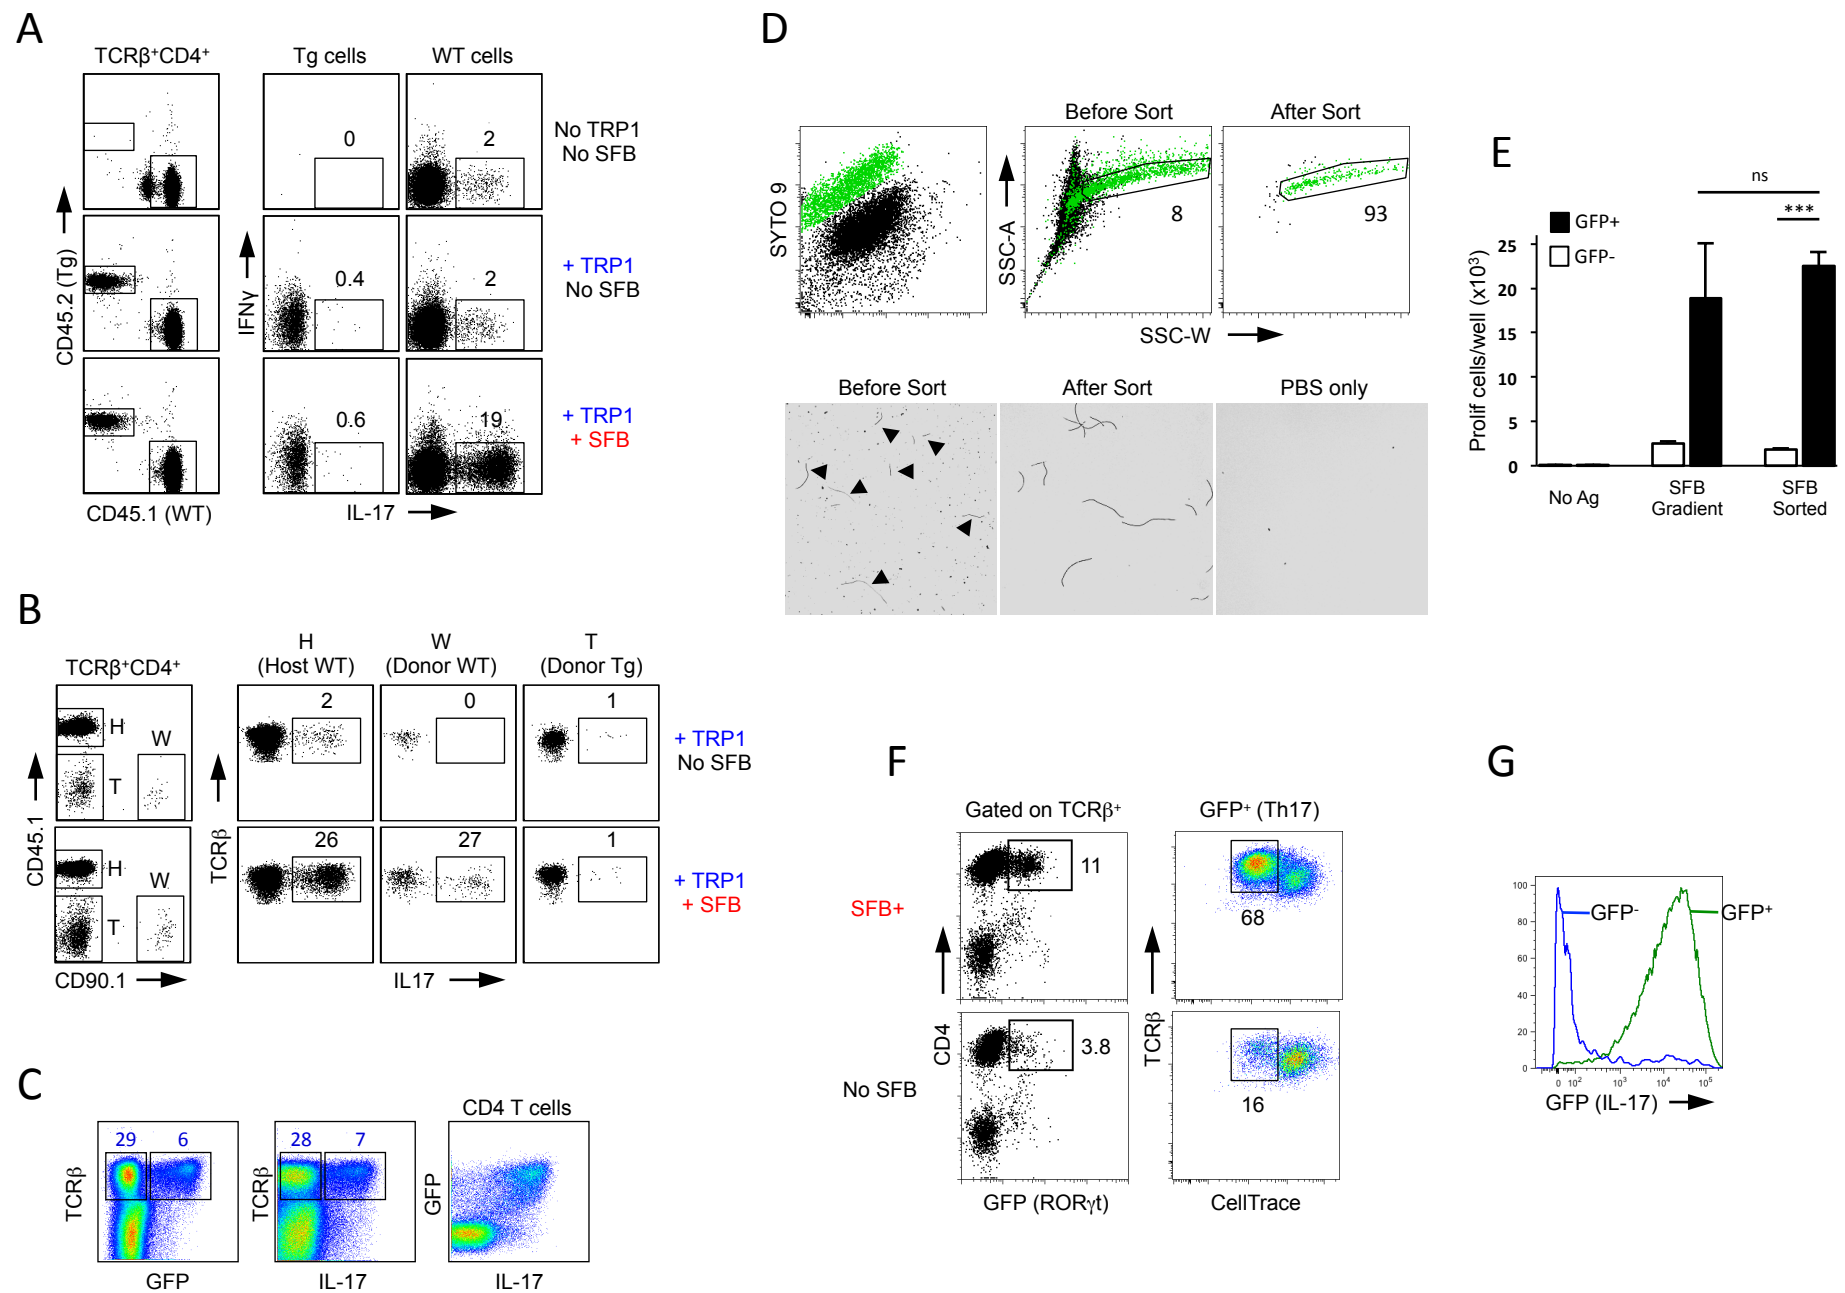

Figure S3

**A**

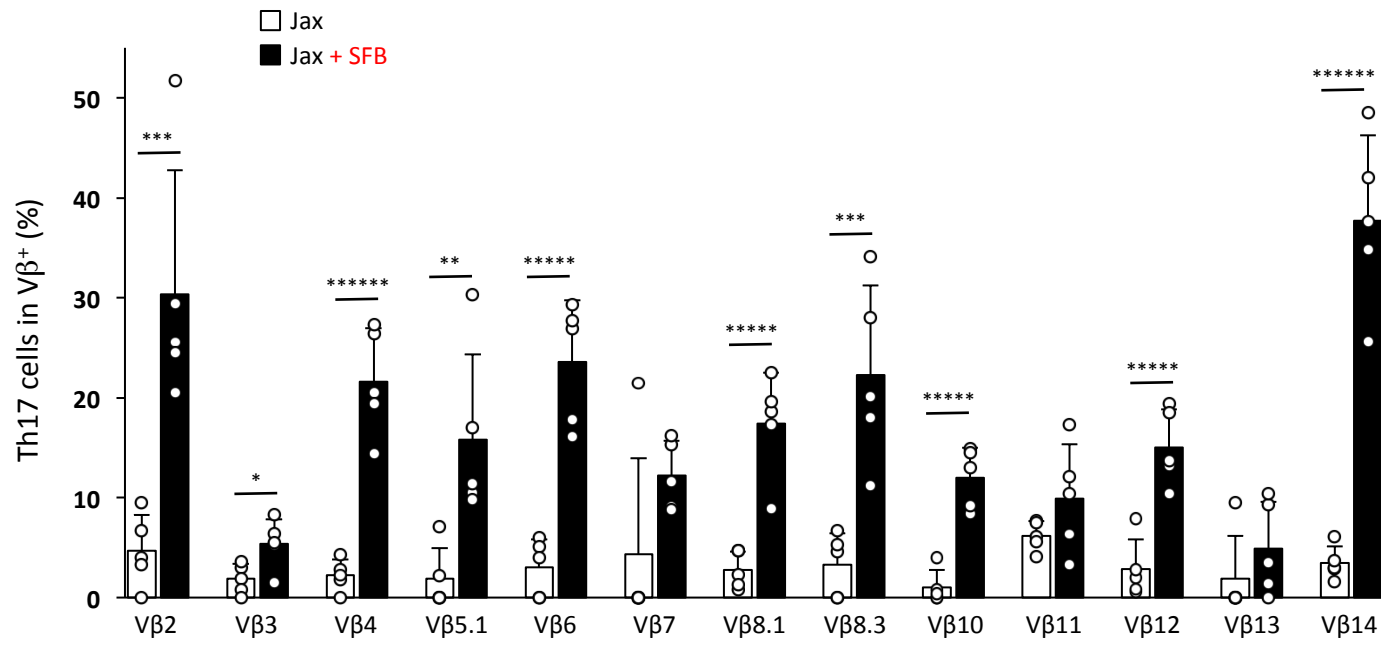

**B**

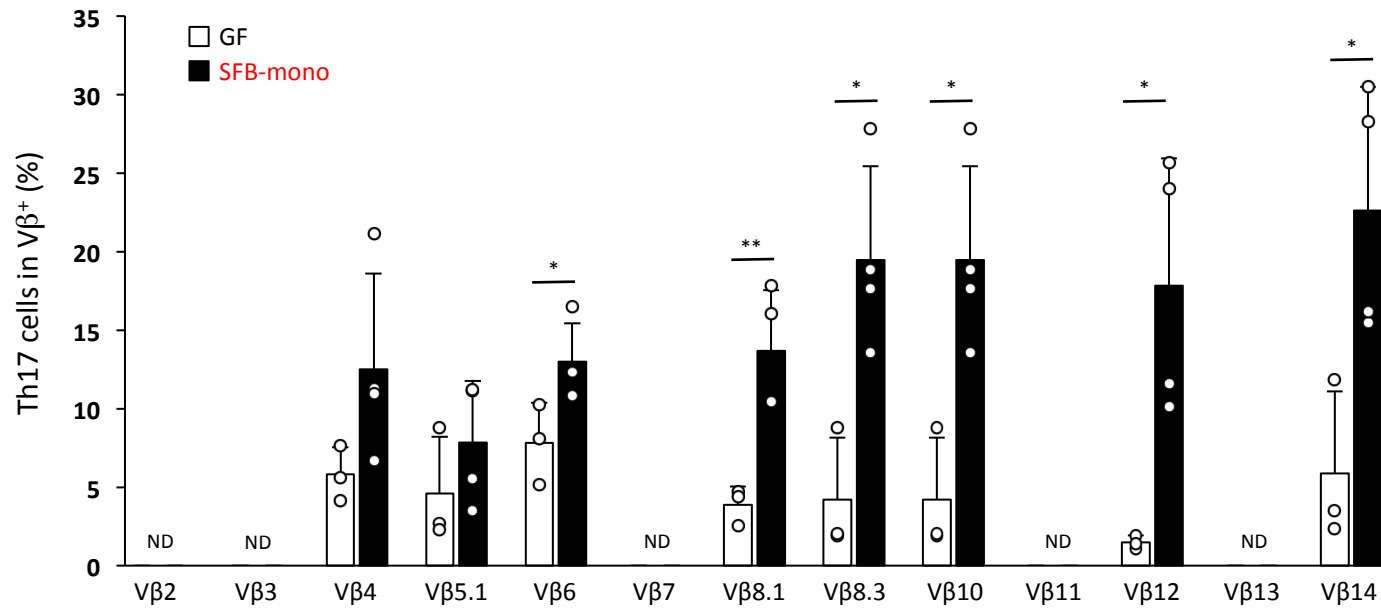

Figure S4

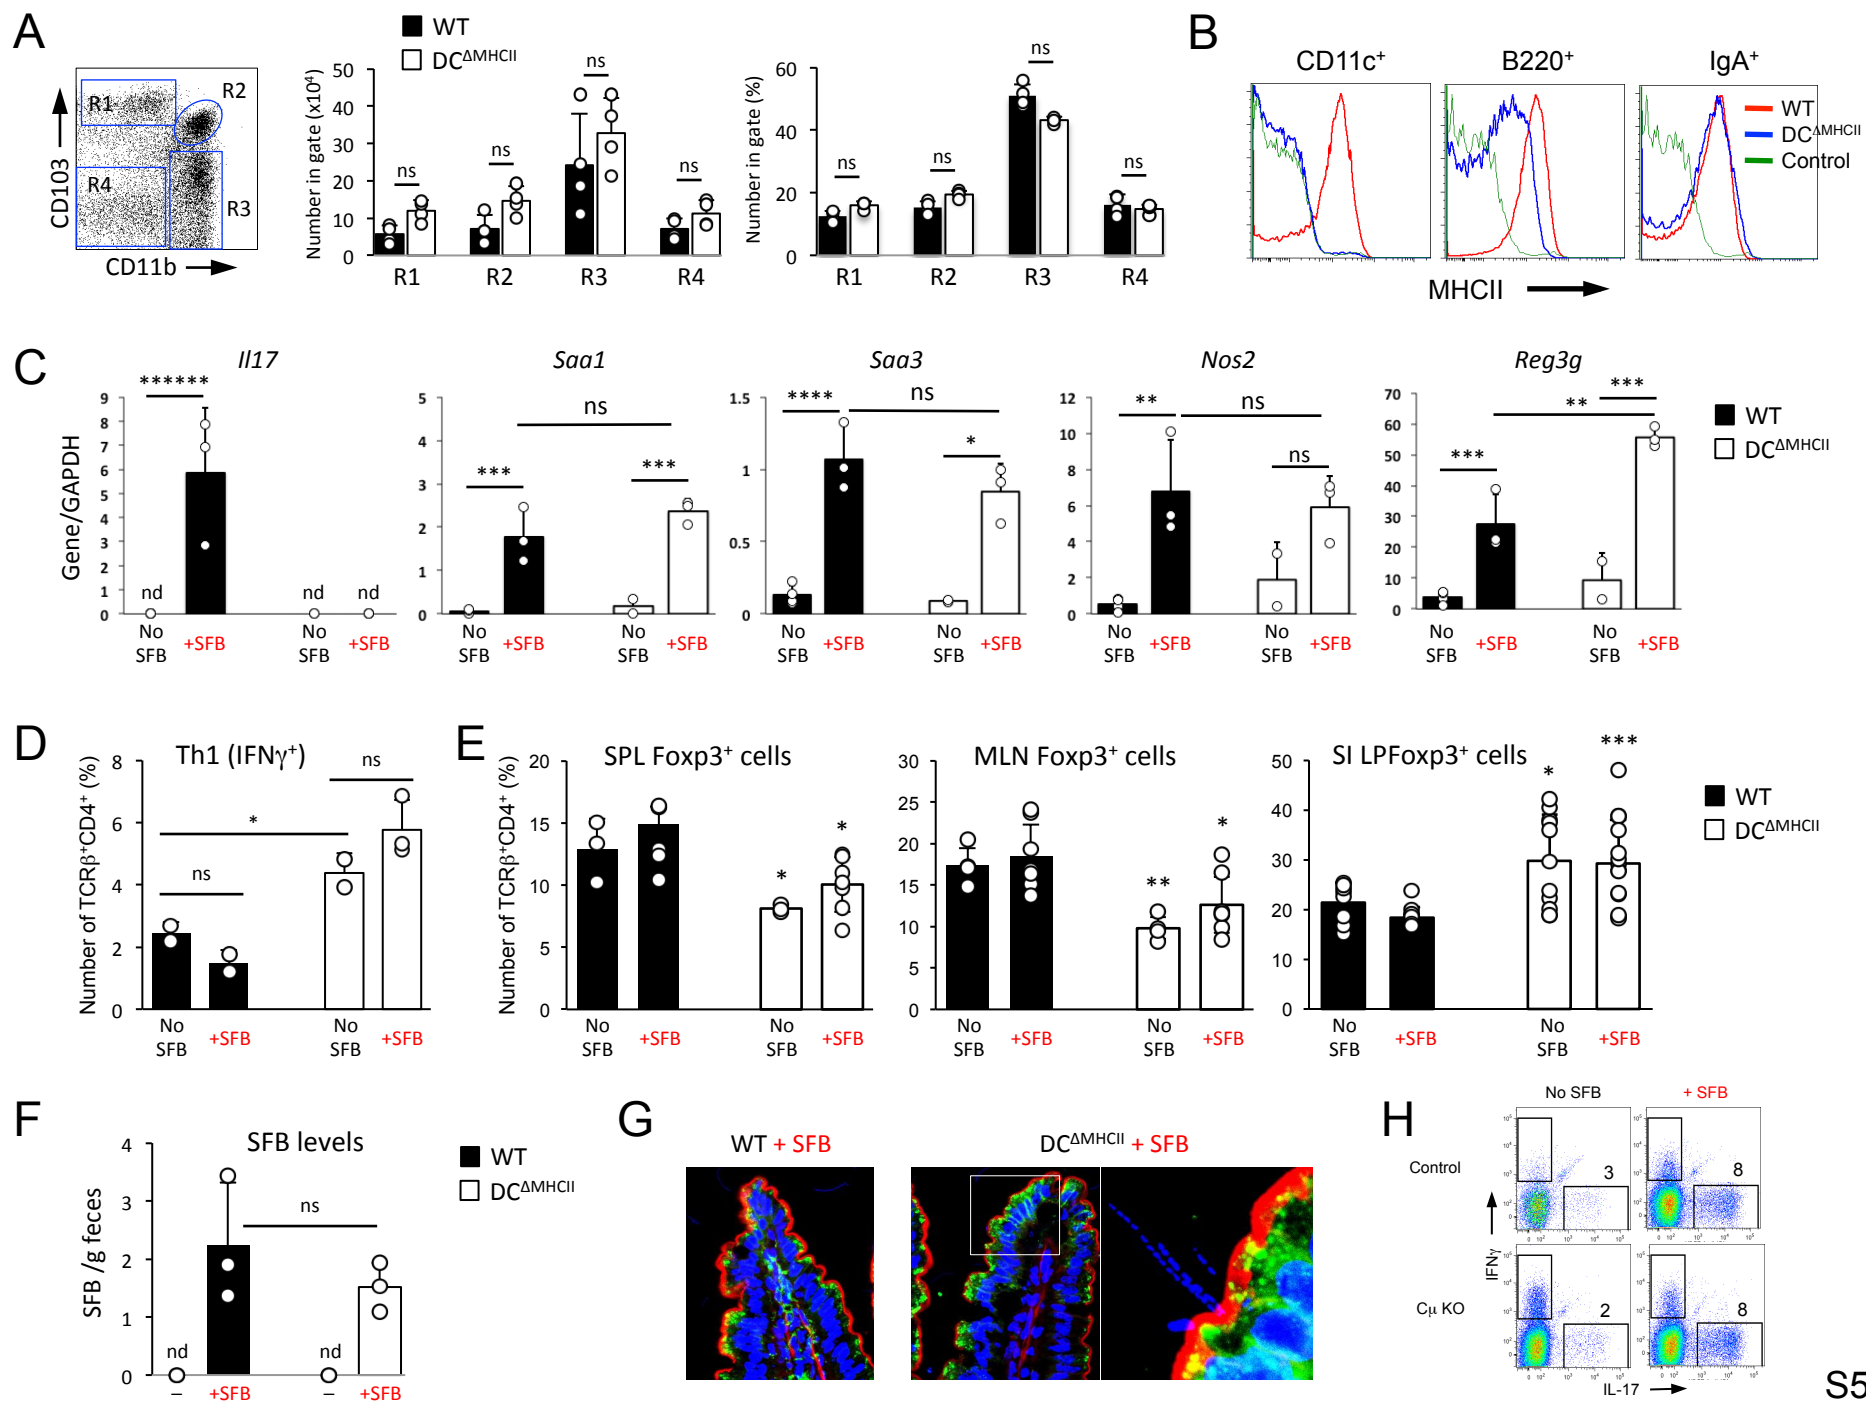

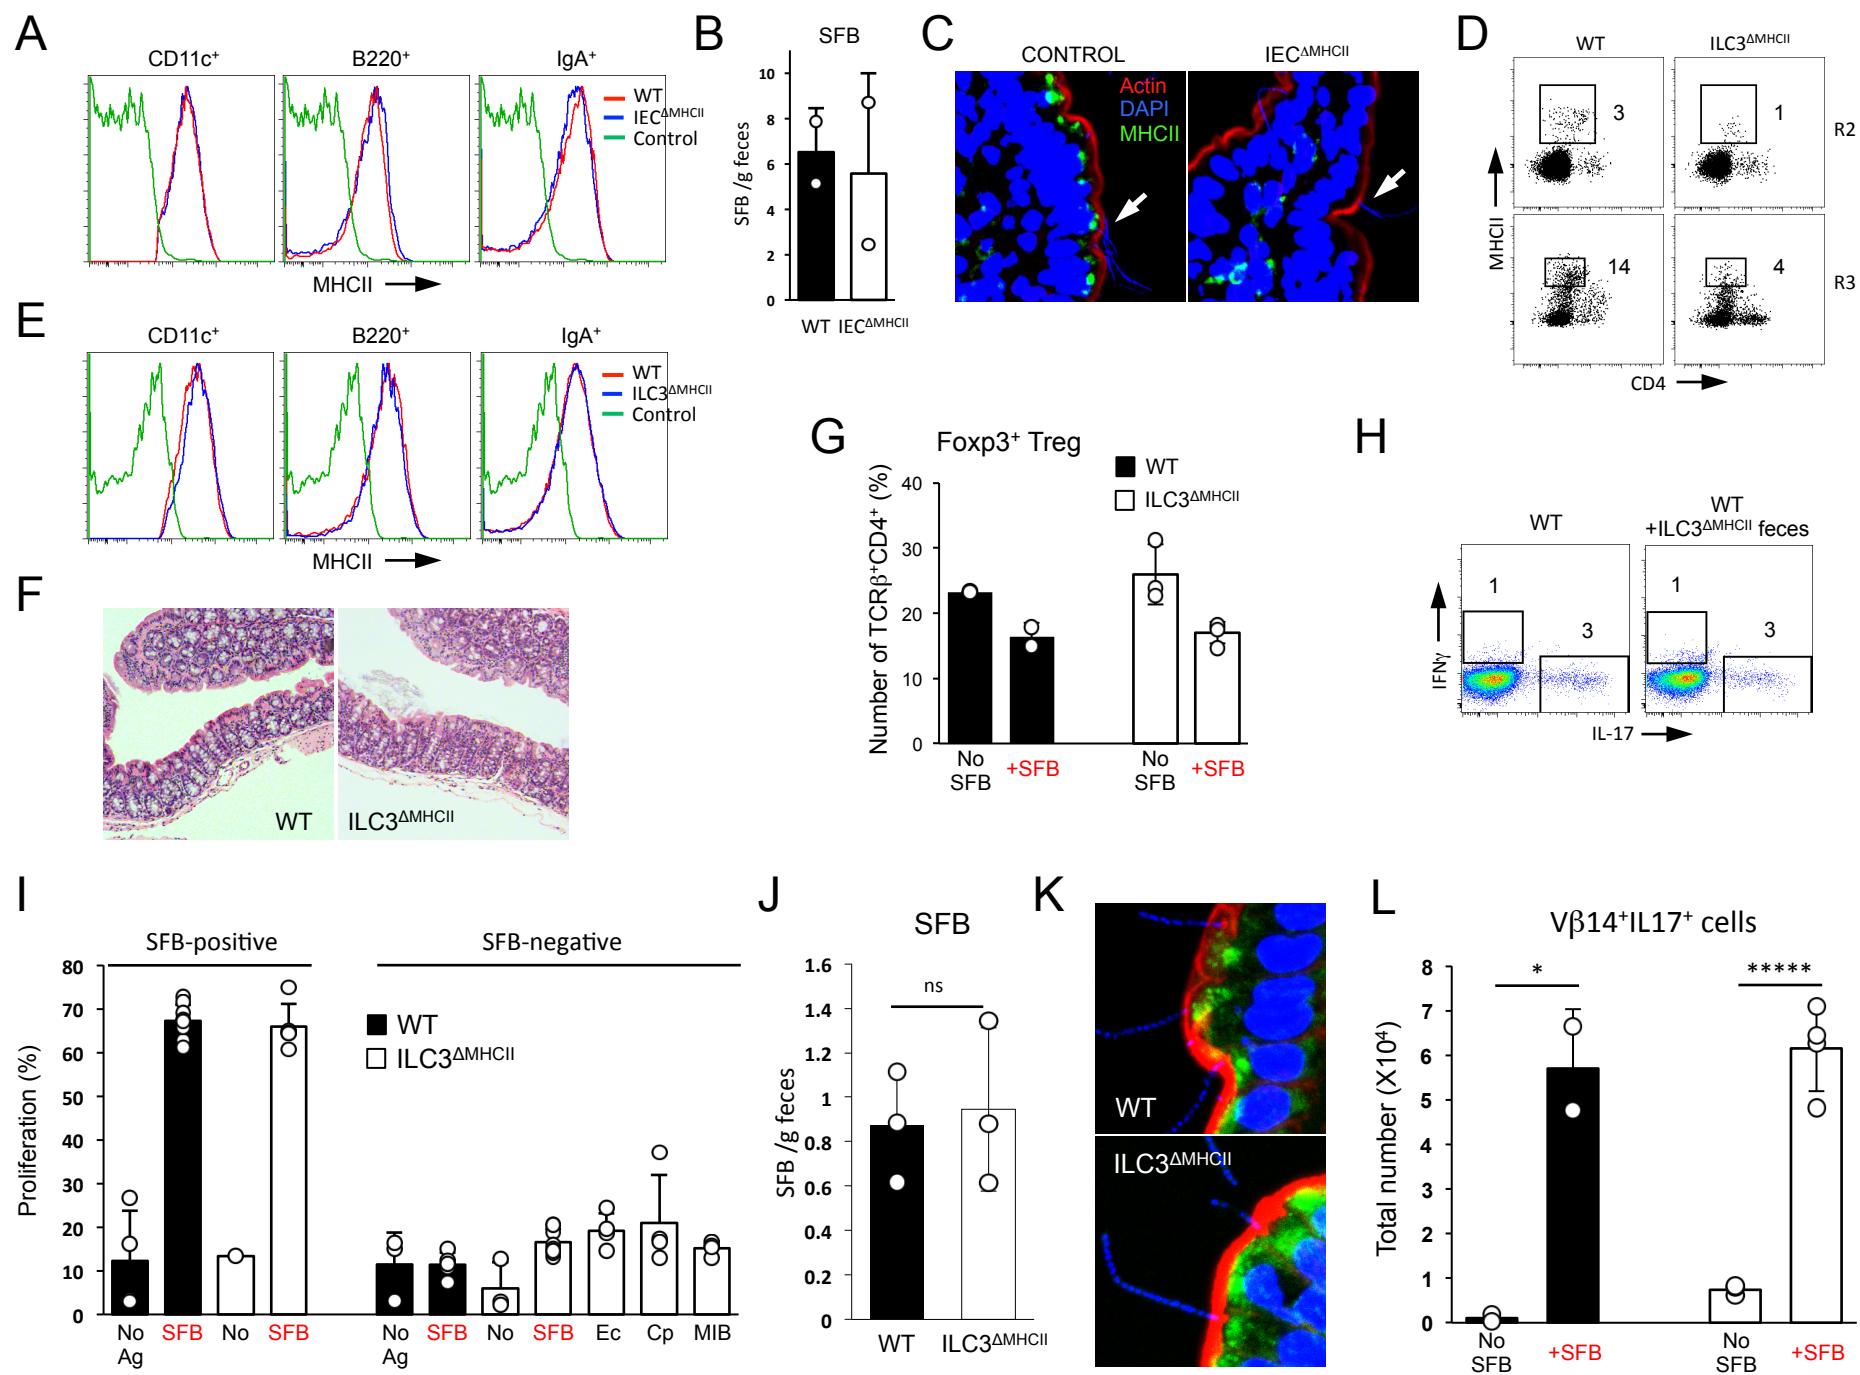

Figure S6

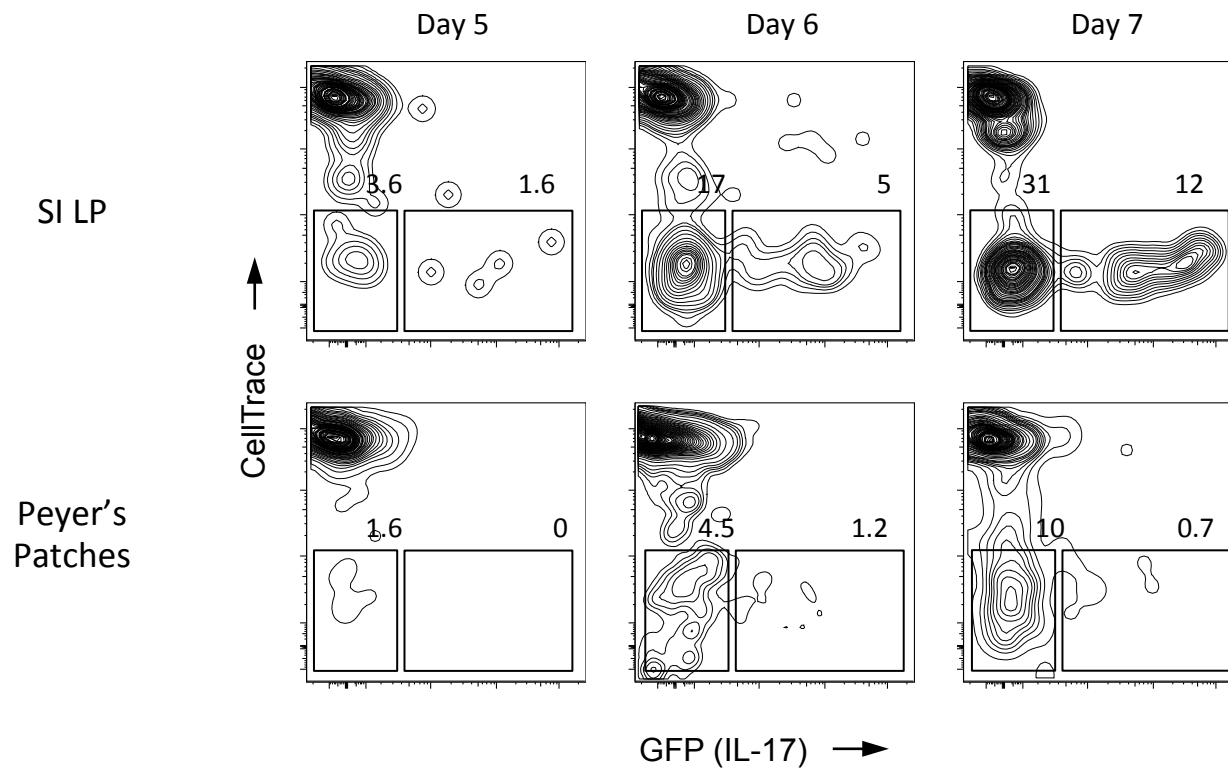

Figure S7

| Clone# | CDR3               | CDR3 Length | V $\beta$ |
|--------|--------------------|-------------|-----------|
| 35     | CTCSAVGGFGEQYF     | 12          | 2         |
| 5      | CTCSAGLGGNTGQLYF   | 14          | 2         |
| 15     | CASSLGDSAETLYF     | 12          | 5.1       |
| 4      | CASSLSFFGGGLQNTLYF | 16          | 7         |
| 20     | CASSLSFFGGGLQNTLYF | 16          | 7         |
| 22     | CASSETISNERLFF     | 12          | 8.3       |
| 31     | CASSATVSNERLFF     | 12          | 8.3       |
| 33     | CASNDWGIEQYF       | 10          | 12        |
| 23     | CAWSSRWGGARAEQFF   | 14          | 14        |
| 39     | CAWSLGAEQFF        | 9           | 14        |
| 12     | CAWSRGTGGNTEVFF    | 13          | 14        |
| 1      | CAWSLANSDYTF       | 10          | 14        |
| 41     | CGARGWGSNQDTQYF    | 13          | 15        |
| 21     | CASSLRGGQNTLYF     | 12          | 16        |
| 32     | CASSSQGAGNTLYF     | 12          | 16        |

Table S1
